# Supplementary material
Source: publisher figshare collection journal article supplement (https://scielo.figshare.com/articles/dataset/_/5719222)
Supplement: Supplementary file 1 [file Table_1.xls]

## Sheet: Table_1
<b>Variables</b>	<b>Description</b>	<b>Used in this study</b>
<strong>Distal Level - Demographic Characteristics</strong>
<strong>Location</strong>	Resident of the State Capital or State Rural Region	1-Capital<br>2-Rural region
<strong>Region</strong>	Macro-region of residence	1-North<br>2-Northeast<br>3-Southeast<br>4-South<br>5-Midwest
<strong>Gender</strong>	Male or Female	1-Male<br>2-Female
<strong>Ethnic group</strong>	Self-referred<br>Yellow and indigenous were excluded due to low representativeness (1.8% and 0.8% respectively) and blacks and browns were grouped into one category (Peres et al., 2013)<a><sup>10</sup></a>	1-White<br>2-Black/Brown
<strong>Distal Level - predisposition or facilitation variables</strong>
<strong>Schooling</strong>	Based on the average schooling of 9.2 years of study found in the studied age range	1- <9.2 years<br>2- &gt;9.2 years
<strong>Household income</strong>	Based on the SBBrasil2010 family socioeconomic characterization questionnaire	1-below R$ 500<br>2- R$501,00 to R$ 1,500<br>3- 1,501 to R$ 4,500<br>4- Over R$ 4,501
<strong>Intermediate Level - Oral Health Condition</strong>
<strong>Decayed front teeth</strong>	Teeth decayed and restored with caries in the frontal region, according to the DMFT	1-Without caries<br>2-With caries
<strong>Decayed back teeth</strong>	Teeth decayed and restored with caries in the back region, according to the DMFT	1-Without caries<br>2-With caries
<strong>Dental service</strong>	Based on the questions: Have you ever been to the dentist? When did you last see the dentist?	0-Never<br>1-Less than one year ago<br>2-One/two years ago<br>3- Three years ago 2and over
<strong>Proximal Level - Dental Loss</strong>
<strong>Loss of front teeth due to caries</strong>	Amount of teeth lost in the frontal region, according to the DMFT	0-None<br>1- =1<br>2- &#8805;2
<strong>Loss of back teeth due to caries</strong>	Amount of teeth lost in the back region, according to the DMFT	0-None<br>1- =1<br>2- &#8805;2
