# Supplementary material
Source: publisher figshare collection journal article supplement (https://scielo.figshare.com/articles/dataset/_/5719222)
Supplement: Supplementary file 2 [file Table_2.xls]

## Sheet: Table_2
<b>Variable</b>	<b>Category</b>	<b>DAI</b>				<b>p-value</b>
		Without/elective		Desirable/severe
		Frequency	%	Frequency	%
Location	Capital	2,727	82.7	571	17.3	0,7252
	Rural area	802	82.0	176	18.0
Region	North	988	82.1	216	17.9	0.4657
	Northeast	947	81.6	214	18.4
	Southeast	623	82.0	137	18.0
	South	458	83.3	92	16.7
	Midwest	513	85.4	88	14.6
Ethnic group	White	1,457	83.6	285	16.4	0.0021
	Black/Brown	2,072	81.8	462	18.2
Household Income	Up to 500	566	81.7	127	18.3	< 0.001
	501 to 1,500	1,726	81.6	389	18.4
	1,501 to 4,500	912	85.0	161	15.0
	> 4,500	155	87.6	22	12.4
Schooling	Up to 9 years	1,885	80.7	451	19.3	0.5290
	Over 9 years	1,635	84.8	293	15.2
Gender	Male	1,589	82.1	346	17.9	0.4438
	Female	1,935	83.0	396	17.0
