# Supplementary material
Source: publisher figshare collection journal article supplement (https://scielo.figshare.com/articles/dataset/_/5719222)
Supplement: Supplementary file 3 [file Table_3.xls]

## Sheet: Table_3
<b>Variable</b>	<b>Category</b>	<b>DAI</b>				<b>p-value</b>
		Without/elective		Desirable/severe
		Frequency	%	Frequency	%
Dental service	Never	519	86.1	84	13.9	0.4776
	Less than one year	1,710	82.2	372	17.9
	One to two years	813	81.4	185	18.5
	Three years and over	438	82.6	93	17.5
Caries in the back units	Without	1,764	84.9	317	15.2	0.4652
	With	1,765	80.4	430	19.6
Caries in the front units	Without	3,087	83.9	591	16.1	0.1484
	With	442	73.9	156	26.1
