# Supplementary material
Source: publisher figshare collection journal article supplement (https://scielo.figshare.com/articles/dataset/_/5719222)
Supplement: Supplementary file 4 [file Table_4.xls]

## Sheet: Table_4
<b>Variable</b>	<b>Category</b>	<b>DAI</b>				<b>p-value</b>
		Without/elective		Desirable/severe
		Frequency	%	Frequency	%
Loss of back units due to caries	0	2,896	84.9	514	15.1	0.0023
	= 1	317	73.4	115	26.6
	≥ 2	316	72.8	118	27.2
Loss of front units due to caries	0	3,514	82.9	727	17.1	0.0002
	= 1	12	52.2	11	47.8
	≥ 2	3	25.0	9	75.0
