# Supplementary material
Source: publisher figshare collection journal article supplement (https://scielo.figshare.com/articles/dataset/_/5719222)
Supplement: Supplementary file 5 [file Table_5.xls]

## Sheet: Table_5
<b>Variable</b>			<b>Estimated</b>	<b><a href="#TFN4">$</a>SE</b>	<b><a href="#TFN5">#</a>Adjusted OR</b>	<b><a href="#TFN6">&amp;</a>CI95%</b>	<b>p-value</b>
Intercept			0.9475	0.2336			<0.0001
Block I (Distal)
	Ethnic group
		White
		Black/Brown	0.2332	0.0978	1.59	1.09-2.34	0.0171
	Household income		-0.3945	0.1002	0.67	0.55-0.82	< 0.0001
Block II (Intermediate)
	Not significant
Block III (Proximal)
	Loss of front units due to caries		0.8446	0.3645	2.32	1.14-4.76	0.0205
	Loss of back units due to caries		0.3743	0.1218	1.45	1.14-1.84	0.0021
